# Supplementary material for: Chemical Analysis Combined with Multivariate Statistical Methods to Determine the Geographical Origin of Milk from Four Regions in China
Source: MDPI journal article supplement (doi:10.3390/foods10051119), 2021-05-18
Supplement: s1 [file s1]

Table S1. Accuracy of OPLS-DA models for milk discrimination between provinces and within the same provinces

| Chemical techniques | Four regions | Within the province |        |        |        |
|---------------------|--------------|---------------------|--------|--------|--------|
|                     |              | HB                  | NMG    | SX     | NX     |
| FA                  | 94.17%       | 93.33%              | 100%   | 100%   | 93.33% |
| ISO                 | 29.17%       | 100%                | 90.33% | 90%    | 73.33% |
| ME                  | 24.17%       | 83.33%              | 83.33% | 93.33% | 93.33% |
| ME/ISO              | 27.50%       | 100%                | 96.67% | 93.33% | 90.00% |
| FA/ISO              | 96.67%       | 100%                | 100%   | 100%   | 90.33% |
| FA/ME               | 95.83%       | 100%                | 100%   | 93.33% | 100%   |
| FA/ME/ISO           | 97.50%       | 100%                | 100%   | 93.33% | 100%   |

FA = Fatty acid; ISO =Isotope; ME = Mineral elements

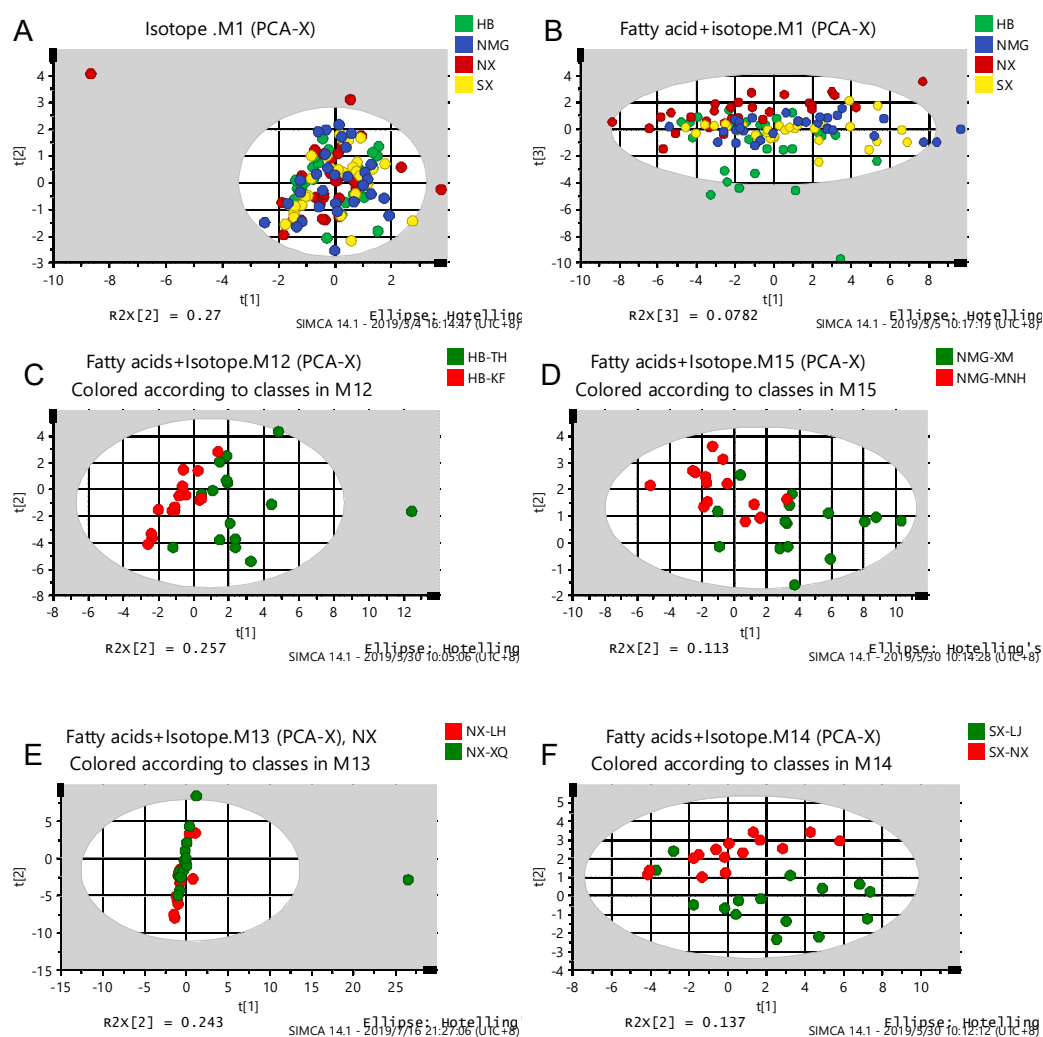

Figure S1. PCA score plots for each technical model: (A/B) Isotope model and isotope-binding fatty acid model for interprovincial samples; (C/D/E/F) Isotope-bound fatty acid models of provincial samples
